## Mechanism of Action of Atracurium on Airways

Elon H. Mehr, M.D.,\* Carol A. Hirshman, M.D.,† Karen S. Lindeman, M.D.‡

Histamine-releasing drugs may produce significant effects on airways in high-risk populations. To determine if clinically relevant doses of atracurium produce adverse effects on airways, we measured changes in airway resistance in the lung periphery of anesthetized Basenji-Greyhound dogs before and after intravenous (iv) administration of atracurium. A wedged bronchoscope technique was used to measure collateral system resistance ( $R_{cs}$ ). After a stable baseline was obtained, atracurium (1.2 or 0.5 mg/kg) or histamine (200  $\mu$ g) were administered as an iv bolus, and percent increase in  $R_{cs}$  was calculated. On separate days dogs were pretreated with the histamine<sub>1</sub> receptor antagonist, chlorpheniramine (0.2 mg/kg iv), with or without atropine (0.2 mg/kg iv) and ranitidine (0.75 mg/kg iv) and the experiment repeated. Histamine (200  $\mu$ g) increased  $R_{cs}$   $97 \pm 24\%$  at 30 s (8 sublobar segments), whereas a second dose increased  $R_{cs}$   $77 \pm 15\%$ . Pretreatment with chlorpheniramine (0.2 mg/kg iv) totally prevented increases in  $R_{cs}$  (9 sublobar segments). Atracurium (1.2 mg/kg) increased  $R_{cs}$  to  $174 \pm 35\%$  at 3 min (14 sublobar segments), whereas 0.5 mg/kg had little effect (10 sublobar segments). A second bolus of atracurium (1.2 mg/kg) increased  $R_{cs}$  to only  $54 \pm 14\%$  ( $P < 0.01$ ). Chlorpheniramine pretreatment (0.2 mg/kg iv) reduced the response to the initial dose of atracurium to only  $26 \pm 14\%$  (10 sublobar segments). Pretreatment with a combination of atropine and chlorpheniramine (4 sublobar segments), or ranitidine and chlorpheniramine (5 sublobar segments), did not attenuate the increase in  $R_{cs}$  significantly more than chlorpheniramine pretreatment alone. We conclude that atracurium produces airway constriction in Basenji-Greyhound dogs and that release of histamine acting on histamine<sub>1</sub> receptors in the airways is important for this effect. (Key words: Antagonists, histamine; chlorpheniramine; ranitidine. Bronchoconstriction: drug effects. Neuromuscular relaxants: atracurium.)

NEUROMUSCULAR BLOCKING DRUGS possess two characteristics which can, at least theoretically, alter airway tone. They are capable of inducing release of histamine from mast cells lining the vessels into which they are injected.<sup>1</sup> In addition, in order to interact with receptors at the neuromuscular junction, these drugs must structurally resemble acetylcholine. Thus, it is possible that they may bind to muscarinic receptors on airway smooth muscle,<sup>2</sup> leading to constriction.

Both *d*-tubocurarine and atracurium cause release of histamine from human mast cell preparations.<sup>3,4</sup> Intra-

venously administered *d*-tubocurarine increases plasma histamine concentration in some patients and produces hypotension,<sup>5</sup> presumably due to direct relaxation effects of histamine on histamine<sub>1</sub> (H<sub>1</sub>) and histamine<sub>2</sub> (H<sub>2</sub>) receptors in vascular smooth muscle.<sup>6</sup> In contrast, histamine mediates contraction of airway smooth muscle by activation of H<sub>1</sub> receptors.<sup>7</sup> However, evidence showing a relationship between drug-induced histamine release and increases in airway tone is less than compelling.<sup>8-10</sup> Moreover, in studies in which the administration of histamine releasing drugs or histamine itself<sup>11-14</sup> produced cardiovascular effects, airway resistance was not measured, and bronchospasm was not reported as a symptom. These studies all were conducted in either normal volunteers or patients with no history of asthma. Mast cells from asthmatic patients show increased histamine releasability,<sup>15</sup> and airways of asthmatic patients are exquisitely sensitive to histamine.<sup>16</sup> Drugs stimulating release of histamine may produce significant effects on airways in such high-risk populations.

We therefore asked whether a clinically relevant dose of the neuromuscular blocking drug, atracurium, produced significant increases in airway tone and, if so, what mechanisms governed the effect in a dog model that showed both increased release of histamine from mast cells<sup>17</sup> and increased airway sensitivity to histamine.<sup>18</sup>

### Materials and Methods

These studies were approved by the Animal Research Committee of The Johns Hopkins University. Eight Basenji-Greyhound (BG) dogs (weight =  $18.5 \pm 0.7$  kg) were anesthetized with intravenous (iv) sodium thiopental (17 mg/kg). Maintenance anesthesia consisted of a continuous infusion of sodium thiopental ( $7-10 \text{ mg} \cdot \text{kg}^{-1} \cdot \text{h}^{-1}$ ), with supplemental doses of fentanyl citrate ( $25-50 \mu\text{g}$ ) administered every 10-30 min. The dogs were not paralyzed. A Harvard constant-volume ventilator (Millis, MA) was used to ventilate the lungs with room air *via* an endotracheal tube. Tidal volume was set at 17 ml/kg, and respiratory rate was adjusted to maintain an end-tidal carbon dioxide concentration of 4.5%. Rectal temperature was monitored and maintained within 1° C of the initial temperature. The electrocardiogram was monitored continuously (Tektronics, Beaverton, OR). Neuromuscular blockade was evaluated by stimulation of the posterior tibial nerve (Neurotechnology, Houston, TX) and assessment of visible dorsiflexion of the animal's hind limb. Blood pressure was measured either noninvasively (Data-

\* Fellow in the Department of Anesthesiology.

‡ Assistant Professor of Anesthesiology.

† Professor of Anesthesiology, Environmental Health Sciences and Medicine.

Received from the Departments of Anesthesiology and Critical Care Medicine and Environmental Health Sciences, The Johns Hopkins Medical Institutions, Baltimore, Maryland. Accepted for publication November 16, 1991. Supported by National Institutes of Health grants HL45974 and HL02417.

Address reprint requests to Dr. Hirshman: The Johns Hopkins School of Hygiene and Public Health, Division of Physiology, Room 7006, 615 North Wolfe Street, Baltimore, Maryland 21205.

scope, Paramus, NJ) every 2.5 min or *via* a 20-G percutaneous femoral arterial catheter connected to a pressure transducer. Anesthetic depth was assessed by canthal reflex, presence of spontaneous movement, breathing, heart rate, and blood pressure.

One or two fiberoptic bronchoscopes (5.5 mm OD) were visually guided through the endotracheal tube, and the tip(s) were lodged in a sublobar airway. A double-lumen catheter (5-Fr) was threaded through the suction port of the bronchoscope. Through one lumen, 5% carbon dioxide in air was delivered to the obstructed segment. A constant flow rate of 200 ml/min ( $\dot{V}_{\text{coll}}$ ), approximating the resting ventilation to the area subtended by the bronchoscope, was maintained throughout the experiment. The other lumen of the double-lumen catheter was connected to a transducer to measure the pressure ( $P_b$ ) at the tip of the bronchoscope. Collateral system resistance ( $R_{cs}$ ) was determined by stopping the ventilator to allow the dog to exhale to functional residual capacity. At this point  $P_b$  reached a plateau, and the pressure in the surrounding unobstructed lung ( $P_{ao}$ ) equaled zero.  $R_{cs}$  ( $\text{cmH}_2\text{O} \cdot \text{ml}^{-1} \cdot \text{s}^{-1}$ ) was calculated as follows:  $R_{cs} = (P_b - P_{ao}) / \dot{V}_{\text{coll}}$ .<sup>19</sup>

Data are presented as percent increase in  $R_{cs}$ : %  $R_{cs} = (R_{csA} - R_{csB}) / R_{csB} \cdot 100$ , where  $R_{csA}$  is  $R_{cs}$  measured 30 s or 3 min after an iv challenge, and  $R_{csB}$  is an average of three measurements of  $R_{cs}$  just before each challenge.

At the end of the experiment, neostigmine (50  $\mu\text{g/kg}$ ) and atropine (25  $\mu\text{g/kg}$ ) were administered every 30 min until full strength had returned. The dogs were monitored continuously until they were fully awake.

## EXPERIMENTAL PROTOCOL

### *Effect of Histamine*

**Repeated Doses:** Four BG dogs were anesthetized, and two fiberoptic bronchoscope tips were wedged in sublobar segments (four right middle and four left middle lobes). In each sublobar segment,  $R_{cs}$  was measured every 5 min until a stable baseline was established for three consecutive readings. Histamine (200  $\mu\text{g}$ ) was then given as an iv bolus, and  $R_{cs}$  subsequently measured 30 s, 2, 5, and 10 min after the bolus. Thereafter,  $R_{cs}$  was measured every 5 min until it stabilized for three consecutive readings. A second dose of histamine (200  $\mu\text{g}$  iv) was then administered and  $R_{cs}$  measured as described above. This dose of histamine was selected based on preliminary experiments that showed that histamine (200  $\mu\text{g}$  iv) produced an increase in  $R_{cs}$  similar to that of atracurium (1.2 mg/kg) used in subsequent experiments.

**Chlorpheniramine:** The effect of a  $H_1$  antagonist, chlorpheniramine, was studied in five BG dogs. Two fiberoptic bronchoscopes were inserted into four dogs (four right

middle lobes, four left middle lobes), and one bronchoscope was inserted into one dog (left middle lobe). The protocol was identical to that described above, except that chlorpheniramine (0.2 mg/kg iv) was administered between the two histamine challenges.

### *Effect of Atracurium*

**Repeated doses:** Seven BG dogs (seven right middle lobes, seven left middle lobes) were studied.  $R_{cs}$  was measured every 5 min until a stable baseline was established for three consecutive readings. Atracurium (1.2 mg/kg iv) was administered, and  $R_{cs}$  was measured 1, 2, 3, 4, 5, 10, and 15 min after the bolus. When  $R_{cs}$  returned to the original baseline, a second dose of atracurium (1.2 mg/kg iv) was administered and  $R_{cs}$  measured as described above.

To determine whether a smaller dose of atracurium increased collateral resistance, six BG dogs were studied on a separate occasion. Two fiberoptic bronchoscopes were inserted into four dogs (four right middle lobes, four left middle lobes), and one bronchoscope was inserted into two dogs (one right middle lobe, one left middle lobe). After a stable baseline  $R_{cs}$  was established, atracurium (0.5 mg/kg iv) was administered and  $R_{cs}$  measured as described above.

**Chlorpheniramine:** Five BG dogs were pretreated with chlorpheniramine (0.2 mg/kg iv) after the induction of anesthesia. Two bronchoscope tips were wedged in sublobar segments (five right middle lobes, five left middle lobes).  $R_{cs}$  was measured every 5 min until it stabilized for three consecutive readings. Atracurium (1.2 mg/kg iv) was administered within 11 min of the dose of chlorpheniramine, and  $R_{cs}$  was measured.

This study was repeated using high-dose chlorpheniramine (5 mg/kg iv) in five dogs (one dog was studied twice). Two bronchoscope tips were wedged in sublobar segments (six right middle lobes, six left middle lobes).

**Chlorpheniramine and Atropine:** Two BG dogs were pretreated with atropine (0.2 mg/kg iv) and then chlorpheniramine (0.2 mg/kg iv) after the induction of anesthesia. The tips of two bronchoscopes were wedged in sublobar segments (two right middle lobes, two left middle lobes).  $R_{cs}$  was measured every 5 min until it stabilized for three consecutive readings. Atracurium (1.2 mg/kg iv) was administered with 17 min of the atropine and within 13 min of the chlorpheniramine, and  $R_{cs}$  was measured.

**Chlorpheniramine and Ranitidine:** Three BG dogs were pretreated with chlorpheniramine (0.2 mg/kg iv) and then ranitidine (0.75 mg/kg iv) after the induction of anesthesia. Two fiberoptic bronchoscopes were inserted into each of two dogs (two right middle lobes, two left middle lobes), and one bronchoscope was inserted into

one dog (right middle lobe).  $R_{cs}$  was measured every 5 min until it stabilized for three consecutive readings. Atracurium (1.2 mg/kg iv) was administered within 26 min of the chlorpheniramine and within 20 min of the ranitidine, and  $R_{cs}$  was measured.

### STATISTICAL ANALYSIS

Analysis of variance and Fisher multiple comparison tests were used to analyze mean differences of  $R_{cs}$  within sublobar segments, and blood pressure and heart rate responses within animals. *T* tests were used to analyze mean differences of  $R_{cs}$  between sublobar segments. Raw data were used for all statistical analyses. We used  $P < 0.05$  to indicate statistical significance. Data are expressed as mean  $\pm$  standard error.

## Results

### EFFECT OF HISTAMINE

#### Repeated Doses

Histamine (200  $\mu$ g iv) increased  $R_{cs}$ , decreased systolic blood pressure, and increased heart rate (fig. 1). Baseline  $R_{cs}$  before the first dose of histamine (200  $\mu$ g iv) was  $0.38 \pm 0.09$  cmH<sub>2</sub>O  $\cdot$  ml<sup>-1</sup>  $\cdot$  s<sup>-1</sup> ( $n = 8$  sublobar segments). Histamine increased  $R_{cs}$  to  $0.68 \pm 0.14$ , a  $97 \pm 24\%$  ( $P < 0.01$ ) increase above baseline at 30 s (fig. 1).  $R_{cs}$  returned to baseline by 10 min. Baseline  $R_{cs}$  before the second dose of histamine was  $0.37 \pm 0.09$  cmH<sub>2</sub>O  $\cdot$  ml<sup>-1</sup>  $\cdot$  s<sup>-1</sup>, which was not significantly different from the first baseline  $R_{cs}$ . After the second dose of histamine,  $R_{cs}$  increased to  $0.66 \pm 0.18$  cmH<sub>2</sub>O  $\cdot$  ml<sup>-1</sup>  $\cdot$  s<sup>-1</sup>, a  $77 \pm 15\%$  increase above the initial baseline at 30 s.  $R_{cs}$  after the second dose of histamine was not significantly different from  $R_{cs}$  after the first dose. Reductions in blood pressure and increases in heart rate were similar after the two doses of histamine (fig. 1).

#### Chlorpheniramine

Chlorpheniramine (0.2 mg/kg) totally prevented the histamine-induced increase in airway tone (fig. 2). Baseline  $R_{cs}$  was  $0.40 \pm 0.08$  cmH<sub>2</sub>O  $\cdot$  ml<sup>-1</sup>  $\cdot$  s<sup>-1</sup> ( $n = 9$  sublobar segments). Histamine (200  $\mu$ g iv) increased  $R_{cs}$  to  $0.62 \pm 0.10$  cmH<sub>2</sub>O  $\cdot$  ml<sup>-1</sup>  $\cdot$  s<sup>-1</sup>, or  $65 \pm 16\%$  increase above baseline at 30 s (fig. 2). After the administration of chlorpheniramine, baseline  $R_{cs}$  ( $0.41 \pm 0.07$  cmH<sub>2</sub>O  $\cdot$  ml<sup>-1</sup>  $\cdot$  s<sup>-1</sup>) was not significantly different from baseline  $R_{cs}$  in the absence of chlorpheniramine. In the presence of chlorpheniramine, histamine did not significantly increase  $R_{cs}$ . In the presence of chlorpheniramine, histamine decreased systolic blood pressure from  $156 \pm 19$  mmHg to  $139 \pm 24$  mmHg at 30 s (fig. 2). This reduction was not significantly

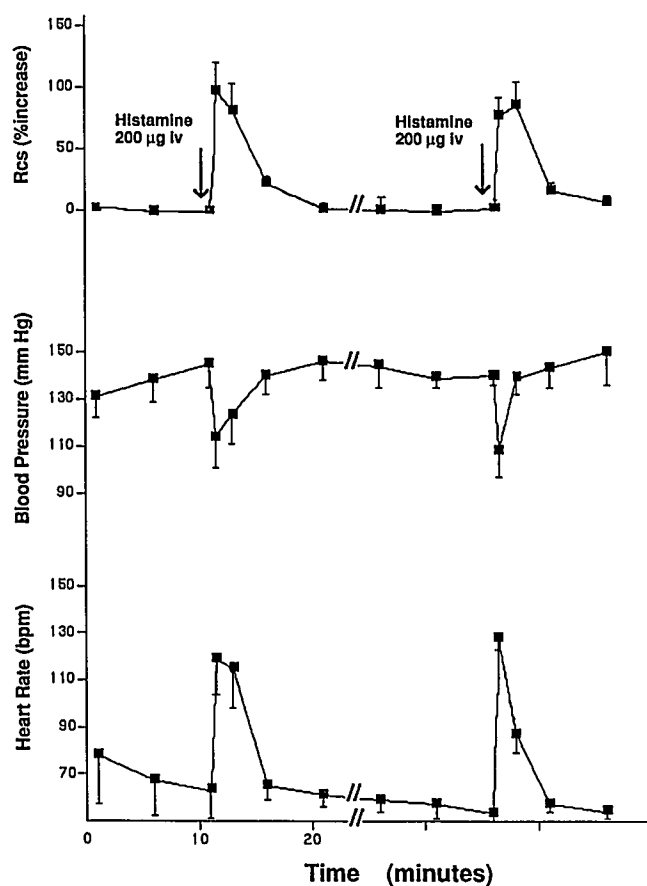

FIG. 1. Airway resistance ( $R_{cs}$ ), blood pressure, and heart rate in response to two sequential iv bolus doses of histamine (200  $\mu$ g iv) in Basenji-Greyhound dogs.  $n = 8$  sublobar segments.

different from the reduction in blood pressure in the absence of chlorpheniramine. In the presence of chlorpheniramine, histamine increased heart rate from  $74 \pm 9$  beats per min to  $109 \pm 14$  beats per min at 30 s. Maximum heart rate was significantly less in the presence of chlorpheniramine ( $P < 0.05$ ).

### EFFECT OF ATRACURIUM

#### Repeated Doses

Atracurium produced significant effects on both airways and the cardiovascular system. Atracurium (1.2 mg/kg) produced an increase in  $R_{cs}$ , a decrease in systolic blood pressure, and an increase in heart rate (fig. 3). Before the first dose of atracurium (1.2 mg/kg), baseline  $R_{cs}$  was  $0.23 \pm 0.04$  cmH<sub>2</sub>O  $\cdot$  ml<sup>-1</sup>  $\cdot$  s<sup>-1</sup> ( $n = 14$  sublobar segments). Peak response to atracurium occurred 3 min after the bolus (fig. 3), at which time  $R_{cs}$  increased to  $0.67 \pm 0.16$  cmH<sub>2</sub>O  $\cdot$  ml<sup>-1</sup>  $\cdot$  s<sup>-1</sup>, or  $174 \pm 35\%$  above the baseline. By 10 min,  $R_{cs}$  had returned to baseline. Before the second dose of atracurium, baseline  $R_{cs}$  was  $0.22 \pm 0.04$

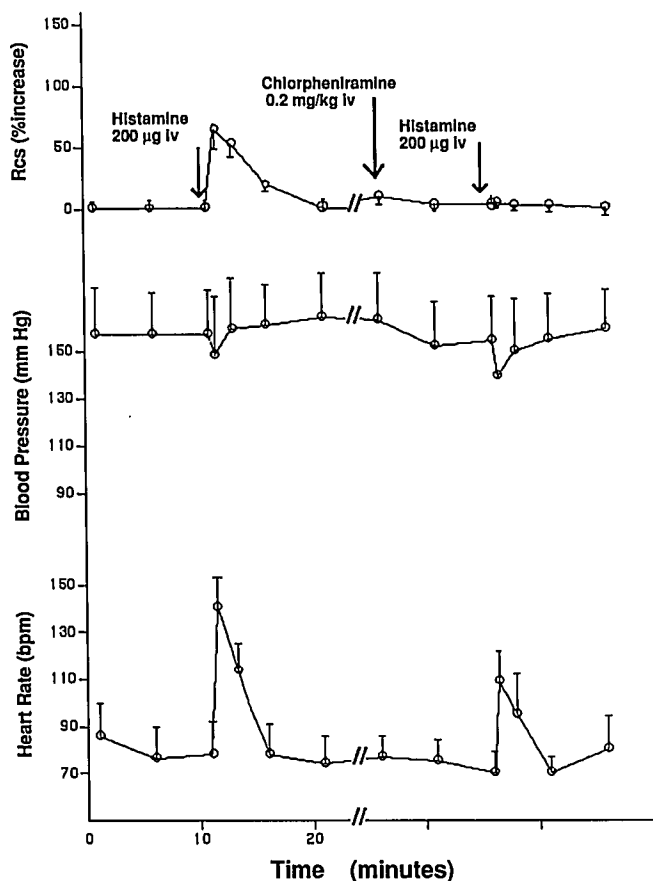

FIG. 2. Airway resistance ( $R_{cs}$ ), blood pressure, and heart rate in response to two sequential iv bolus doses of histamine (200  $\mu$ g iv) in the presence and absence of chlorpheniramine (0.2 mg/kg iv) in Basenji-Greyhound dogs.  $n = 9$  sublobar segments.

$\text{cmH}_2\text{O} \cdot \text{ml}^{-1} \cdot \text{s}^{-1}$ , which was not significantly different from the baseline before the first dose. A second dose of atracurium, administered 19–43 min after the first dose, increased  $R_{cs}$  to only  $0.38 \pm 0.09 \text{ cmH}_2\text{O} \cdot \text{ml}^{-1} \cdot \text{s}^{-1}$ , or  $54 \pm 14\%$  above baseline at 3 min. Thus, peak  $R_{cs}$  was significantly less than peak  $R_{cs}$  following the first dose of atracurium ( $P < 0.01$ ).

Systolic blood pressure before the first dose of atracurium was  $142 \pm 5 \text{ mmHg}$  and decreased to  $81 \pm 8 \text{ mmHg}$  at 3 min (fig. 3). Before the second dose of atracurium, systolic blood pressure was  $145 \pm 7 \text{ mmHg}$  and decreased to  $112 \pm 10 \text{ mmHg}$  after the second dose of atracurium. The lowest systolic blood pressure was significantly different between the first and second doses ( $P < 0.01$ ). Atracurium increased heart rate from  $101 \pm 5$  beats per min to  $155 \pm 7$  beats per min after the first dose (fig. 3) and from  $134 \pm 7$  beats per min to  $143 \pm 11$  beats per min after the second dose. The peak heart rate after the second dose of atracurium was not significantly different from the peak heart rate after the first dose.

### Varying Doses

Atracurium (0.5 mg/kg) did not significantly increase  $R_{cs}$ :  $R_{cs}$  was  $0.24 \pm 0.05$  and  $0.25 \pm 0.05 \text{ cmH}_2\text{O} \cdot \text{ml}^{-1} \cdot \text{s}^{-1}$  ( $n = 10$  sublobar segments) before and 3 min after atracurium, respectively ( $P = 0.48$ ).

### Chlorpheniramine

Chlorpheniramine significantly attenuated but did not abolish the increase in  $R_{cs}$ . Baseline  $R_{cs}$  in dogs pretreated with low-dose chlorpheniramine (0.2 mg/kg) was  $0.37 \pm 0.08 \text{ cmH}_2\text{O} \cdot \text{ml}^{-1} \cdot \text{s}^{-1}$  ( $n = 10$  sublobar segments). Atracurium given within 11 min of the chlorpheniramine dose produced a significant increase in  $R_{cs}$  (fig. 3) ( $P = 0.0001$ ). In the presence of chlorpheniramine, atracurium increased peak  $R_{cs}$  to  $0.52 \pm 0.13 \text{ cmH}_2\text{O} \cdot \text{ml}^{-1} \cdot \text{s}^{-1}$  or only  $26 \pm 14\%$  above baseline at 3 min. Baseline systolic blood pressure decreased from 144

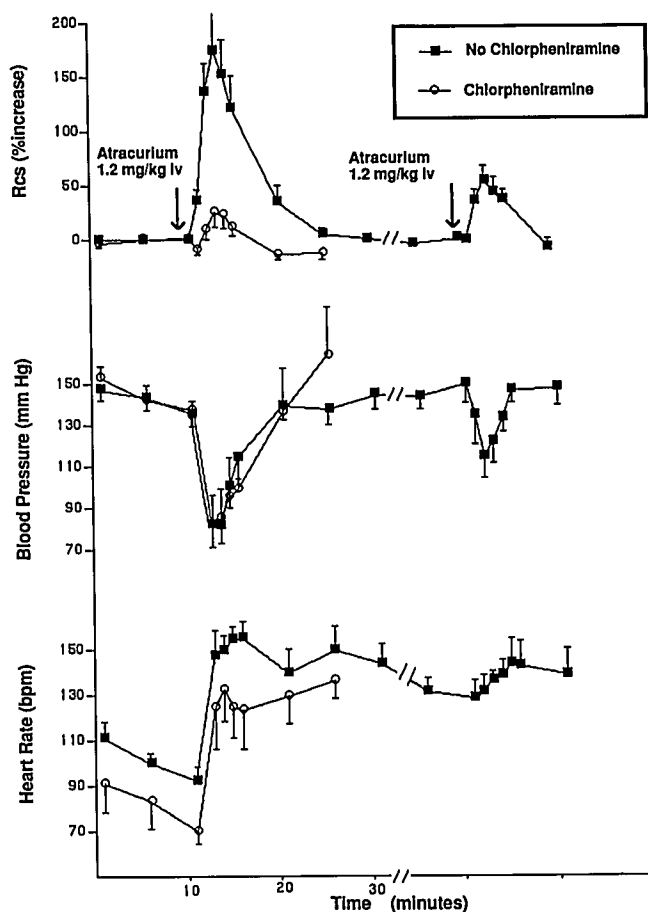

FIG. 3. Airway resistance ( $R_{cs}$ ), blood pressure, and heart rate in response to atracurium (1.2 mg/kg iv bolus) with and without chlorpheniramine (0.2 mg/kg iv) pretreatment in Basenji-Greyhound dogs.  $n = 14$  sublobar segments without chlorpheniramine;  $n = 10$  sublobar segments with chlorpheniramine.

$\pm 4$  mmHg to  $82 \pm 14$  mmHg postchallenge (fig. 3). Baseline heart rate increased from  $81 \pm 10$  beats per min to  $132 \pm 14$  beats per min postchallenge (fig. 3).

In animals pretreated with high-dose chlorpheniramine (5 mg/kg), atracurium (1.2 mg/kg) did not significantly increase  $R_{cs}$  during the 10-min period of observation ( $n = 12$  sublobar segments). Baseline  $R_{cs}$  following pretreatment with chlorpheniramine (5 mg/kg) was  $0.17 \pm 0.03$   $\text{cmH}_2\text{O} \cdot \text{ml}^{-1} \cdot \text{s}^{-1}$  (table 1). Atracurium (1.2 mg/kg) did not significantly increase  $R_{cs}$ . In fact, a small reduction in  $R_{cs}$  to  $0.14 \pm 0.03$   $\text{cmH}_2\text{O} \cdot \text{ml}^{-1} \cdot \text{s}^{-1}$  was observed ( $P = 0.023$ ).

#### Chlorpheniramine and Atropine

The combination of atropine and chlorpheniramine was no more protective than chlorpheniramine alone. Baseline  $R_{cs}$  after pretreatment with both chlorpheniramine (0.2 mg/kg iv) and atropine (0.2 mg/kg iv) was  $0.36 \pm 0.11$   $\text{cmH}_2\text{O} \cdot \text{ml}^{-1} \cdot \text{s}^{-1}$  ( $n = 4$  sublobar segments) (table 1).  $R_{cs}$  increased to  $0.53 \pm 0.17$   $\text{cmH}_2\text{O} \cdot \text{ml}^{-1} \cdot \text{s}^{-1}$ , a  $45 \pm 12\%$  increase, after the administration of atracurium. Peak  $R_{cs}$  was not significantly different from peak  $R_{cs}$  ( $0.52 \pm 0.13$   $\text{cmH}_2\text{O} \cdot \text{ml}^{-1} \cdot \text{s}^{-1}$ ) following pretreatment with chlorpheniramine alone ( $P = 0.98$ ). Baseline systolic blood pressure after chlorpheniramine and atropine pretreatment was  $151 \pm 1$  mmHg and decreased to  $44 \pm 6$  postchallenge ( $P < 0.01$ ). Baseline heart rate after chlorpheniramine and atropine pretreatment was  $169 \pm 5$  beats per min, which did not significantly change after administration of atracurium.

#### Chlorpheniramine and Ranitidine

The addition of ranitidine did not increase the protection afforded by chlorpheniramine. Baseline  $R_{cs}$  in dogs pretreated with chlorpheniramine (0.2 mg/kg iv) and ranitidine concurrently (0.75 mg/kg iv) was  $0.32 \pm 0.08$   $\text{cmH}_2\text{O} \cdot \text{ml}^{-1} \cdot \text{s}^{-1}$  ( $n = 5$  sublobar segments) (table 1).

$R_{cs}$  increased to  $0.46 \pm 0.12$   $\text{cmH}_2\text{O} \cdot \text{ml}^{-1} \cdot \text{s}^{-1}$ ,  $47 \pm 29\%$  above baseline, 3 min after atracurium (table 1). Peak  $R_{cs}$  was not significantly different from peak  $R_{cs}$  following pretreatment with chlorpheniramine alone ( $P = 0.74$ ). Systolic blood pressure, after pretreatment with chlorpheniramine and ranitidine, was  $143 \pm 4$  mmHg and did not decrease after atracurium challenge. Baseline heart rate after chlorpheniramine and ranitidine was  $95 \pm 21$  beats per min, which did not significantly change after administration of atracurium.

#### Discussion

The present study demonstrates that atracurium produces significant effects on the airways as well as on the cardiovascular system. The airway effects are short-lived, are dose-related, are qualitatively similar to an iv bolus of histamine, and are markedly attenuated by pretreatment with a  $H_1$  receptor antagonist.

Crago *et al.*,<sup>10</sup> Simpson *et al.*,<sup>9</sup> and Gerbershagan and Bergman<sup>8</sup> failed to find significant increases in airway tone after administration of *d*-tubocurarine to humans with normal lung function. However, Crago *et al.*<sup>10</sup> did find greater increases in airway resistance in subjects with preexisting lung disease paralyzed with *d*-tubocurarine, than with pancuronium, but did not follow up this observation with histamine receptor antagonist studies.

We are aware of only one study in humans that examined changes in airway tone after atracurium.<sup>9</sup> Simpson *et al.*<sup>9</sup> found a significant decrease in specific airways conductance at only one time point, 6 min after administration of a 0.5-mg/kg dose to humans. Our results differ from those of Simpson *et al.*<sup>9</sup> in that the peak effect on airways occurred 3 min after administration of an even higher dose of drug. A maximal effect at 3 min, not 6 min, agrees with the study of Moss *et al.*,<sup>5</sup> who showed that, for *d*-tubocurarine, maximal plasma histamine concentrations were attained at 2 min and that by 5 min,

TABLE 1. Peripheral Airway Resistance ( $R_{cs}$ ) Before and After Histamine and Atracurium

| Treatment                                                         | Baseline        | Peak $R_{cs}$   | Sublobar Segments |
|-------------------------------------------------------------------|-----------------|-----------------|-------------------|
| Histamine 200- $\mu\text{g}$ iv bolus                             |                 |                 |                   |
| First dose                                                        | $0.38 \pm 0.09$ | $0.68 \pm 0.14$ | $n = 8$           |
| Second dose                                                       | $0.37 \pm 0.09$ | $0.66 \pm 0.18$ | $n = 8$           |
| Chlorpheniramine 0.2-mg/kg pretreatment                           | $0.41 \pm 0.07$ | $0.41 \pm 0.07$ | $n = 9$           |
| Atracurium 1.2-mg/kg iv bolus                                     |                 |                 |                   |
| First dose                                                        | $0.23 \pm 0.04$ | $0.67 \pm 0.16$ | $n = 14$          |
| Second dose                                                       | $0.22 \pm 0.04$ | $0.38 \pm 0.09$ | $n = 14$          |
| Chlorpheniramine 0.2-mg/kg pretreatment                           | $0.37 \pm 0.08$ | $0.52 \pm 0.13$ | $n = 10$          |
| Chlorpheniramine 5-mg/kg pretreatment                             | $0.17 \pm 0.03$ | $0.17 \pm 0.03$ | $n = 12$          |
| Chlorpheniramine 0.2-mg/kg and atropine 0.2-mg/kg pretreatment    | $0.36 \pm 0.11$ | $0.53 \pm 0.17$ | $n = 14$          |
| Chlorpheniramine 0.2-mg/kg and ranitidine 0.75-mg/kg pretreatment | $0.32 \pm 0.08$ | $0.46 \pm 0.12$ | $n = 5$           |
| Atracurium 0.5-mg/kg iv bolus                                     |                 |                 |                   |
| One dose                                                          | $0.24 \pm 0.05$ | $0.25 \pm 0.05$ | $n = 10$          |

histamine concentrations had returned to control values. Clinically significant effects on both the airways and the cardiovascular system were not seen in our study with the lower dose (0.5 mg/kg) of atracurium. This agrees with a study in humans<sup>20</sup> that showed that significant increases in heart rate and decreases in mean arterial blood pressure occurred after a bolus of a higher dose than 0.5 mg/kg of atracurium. A steep dose-response relationship for histamine release by atracurium from human mast cells has also been demonstrated.<sup>3,4</sup>

Plasma histamine concentrations were not measured in this study because it was unclear to us at which site they should be measured. Measured plasma levels of histamine only roughly reflect histamine release from tissue but do not presumably account for the large amount of histamine metabolized or taken up within various tissue beds. Instead, we elected to inject into the systemic circulation a bolus dose of histamine that produced a similar airway constrictor response to atracurium 1.2 mg/kg. Two differences were seen between histamine and atracurium. Atracurium induced peak effects on airways at 3 min, whereas peak effects of histamine were seen at 30 s. Moreover, the airways exhibited reduced responsiveness to a second dose of atracurium but not to histamine, presumably reflecting depleted histamine stores in the mast cells, not rapid desensitization of the airways to circulating histamine.

Both vascular and airway smooth muscle contain H<sub>1</sub> and H<sub>2</sub> receptors. Histamine induces dilatation of resistance vessels by stimulation of both H<sub>1</sub> and H<sub>2</sub> receptors. H<sub>1</sub> receptors are believed to mediate the immediate response, whereas H<sub>2</sub> receptors are believed to mediate the more sustained response.<sup>21</sup> In contrast, histamine produces constriction of airway smooth muscle of many species including the human and the dog, mediated by H<sub>1</sub> receptors.<sup>22</sup> However, in the presence of H<sub>1</sub> blockade histamine can induce bronchodilation mediated by H<sub>2</sub> receptors.<sup>22</sup> Our results are consistent with these theories. A combination of H<sub>1</sub> and H<sub>2</sub> receptor blockade significantly attenuated the cardiovascular effects of atracurium. Moreover, H<sub>1</sub> receptor blockade totally abolished histamine-induced airway constriction and markedly attenuated atracurium-induced airway constriction. It is unlikely that the small residual constriction provoked by atracurium in the presence of H<sub>1</sub> receptor blockade was due to stimulation of muscarinic cholinergic receptors,<sup>2</sup> since atropine in concentrations known to block airway muscarinic receptors<sup>23</sup> failed to modify this response. A combination of H<sub>1</sub> and H<sub>2</sub> receptor blockade also failed to abolish the small residual constriction provoked by atracurium. It is possible that H<sub>2</sub> receptor-induced dilatation is not important in this model. It is also possible that H<sub>2</sub> antagonists could have concurrently increased histamine release from mast cells, since histamine acting

via H<sub>2</sub> receptors has been shown to inhibit histamine release from basophils.<sup>24</sup> A more likely possibility is that the small residual constriction reflects the presence in the airways of other bronchoactive inflammatory mediators released along with histamine.

One additional explanation for the residual airway constriction is prejunctional activity of atracurium. One study in dogs showed that atracurium increased total pulmonary resistance during vagal stimulation.<sup>25</sup> The authors hypothesized that this could be due to blockade of prejunctional muscarinic receptors (M2) that inhibit vagally mediated increases in pulmonary resistance.

In this study, we assessed the effects of atracurium on peripheral airway resistance. We suspected that if atracurium released histamine, then changes in airway resistance would be most easily detected in the lung periphery, the predominant site of histamine-induced airway constriction in the dog.<sup>26</sup> Peripheral airway caliber was determined by assessing changes in R<sub>cs</sub>. In the past, pathways for collateral flow were believed to be comprised of pores of Kohn, bronchoalveolar channels of Lambert, and interbronchiolar channels of Martin.<sup>27,28</sup> Recent evidence, however, has demonstrated that the predominant pathway for collateral flow is through interbronchiolar channels of Martin, so that R<sub>cs</sub> primarily reflects resistance at the level of the alveolar duct.<sup>19</sup> In addition, collateral system responses are very similar to those of other normal small airways.<sup>29,30</sup> Thus, it appears likely that atracurium-induced changes in R<sub>cs</sub> in this study truly reflect constriction of peripheral airways.

In summary, atracurium constricts peripheral airways in doses that produce significant cardiovascular effects. Release of histamine acting on H<sub>1</sub> receptors is important for this effect. Our study suggests that airway constrictor effects of atracurium can largely be prevented in high-risk populations by using low drug doses, divided doses, and H<sub>1</sub> receptor antagonists.

## References

1. Paton WDM: Histamine release by compounds of simple chemical structure. *Pharmacol Rev* 9:269-328, 1957
2. Bowman WC: Non-relaxant properties of neuromuscular blocking drugs. *Br J Anaesth* 54:147-160, 1982
3. North FC, Kettelkamp N, Hirshman CA: Comparison of cutaneous and *in vitro* histamine release by muscle relaxants. *ANESTHESIOLOGY* 66:543-546, 1987
4. Stellato C, dePaulis A, Cirillo R, Mastronardi P, Mazzarella B, Marone G: Heterogeneity of human mast cells and basophils in response to muscle relaxants. *ANESTHESIOLOGY* 74:1078-1086, 1991
5. Moss J, Rosow CE, Savarese JJ, Philbin DM, Kniffen KJ: Role of histamine in the hypotensive action of *d*-tubocurarine in humans. *ANESTHESIOLOGY* 55:19-25, 1981
6. Moss J, Rosow CE: Histamine release by narcotics and muscle relaxants in humans. *ANESTHESIOLOGY* 59:330-339, 1983

7. Eiser NM: Histamine antagonists and asthma. *Pharmacol Ther* 17:239-250, 1982
8. Gerbershagen HU, Bergman NA: The effect of *d*-tubocurarine on respiratory resistance in anesthetized man. *ANESTHESIOLOGY* 28:981-984, 1967
9. Simpson DA, Wright DJ, Hammond JE: Influence of tubocurarine, pancuronium and atracurium on bronchomotor tone. *Br J Anaesth* 57:753-757, 1985
10. Crago RR, Bryan AC, Laws AK, Winestock AE: Respiratory flow resistance after curare and pancuronium measured by forced oscillations. *Can Anaesth Soc J* 19:607-614, 1972
11. Ind PW, Brown MJ, Lhoste JJM, Maguin I, Dollery CT: Determination of histamine and its metabolites: Concentration effect relationships of infused histamine in normal volunteers. *Agents Actions* 69:283-289, 1982
12. Kaliner M, Shellhamer GH, Ottesen EA: Effects of infused histamine: Correlation of plasma histamine levels and symptoms. *J Allergy Clin Immunol* 69:283-289, 1982
13. Lorenz W, Doenicke A, Schoning B, Neugebauer E: The role of histamine in adverse reactions to intravenous agents, Monographs in Anaesthesiology: Number 8. *Adverse Reactions to Intravenous Agents*. Edited by Thornton JW. Elsevier, Oxford Press, 1981, pp 169-238
14. Vigorito C, Russo P, Picotti G, Chiarello M, Poto S, Marone G: Cardiovascular effects of histamine infusion in man. *J Cardiovasc Pharmacol* 5:531-537, 1983
15. Casale TB, Wood D, Richardson HB, Trapp S, Metzger WJ, Zavala D, Hunningtrake GW: Elevated bronchoalveolar lavage fluid histamine levels in allergic asthmatics are associated with methacholine bronchial hyperresponsiveness. *J Clin Invest* 79:1197-1203, 1987
16. Spector SL, Staudenmayer H, Kinsman RA, Fukuhara J, Westmoreland C: Methacholine and histamine inhalation challenge in asthma: Relationships to age of onset, length of illness and pulmonary function. *Allergy* 34:167-173, 1979
17. Hirshman CA, Austin DR, Kettelkamp NS: Enhanced bronchoalveolar lavage cell histamine releasability in allergic dogs with and without airway hyperresponsiveness. *J Allergy Clin Immunol* 81:829-835, 1988
18. Hirshman CA, Downes H: Airway responses to methacholine and histamine in basenji-greyhound and other purebred dogs. *Respir Physiol* 63:339-346, 1986
19. Mitzner W: Collateral ventilation, *The Lung: Scientific Foundations*. Edited by Crystal RG, West JB. New York, Raven Press, 1991, pp 1053-1063
20. Scott RPF, Savarese JJ, Basta SJ, Sunder N, Ali HH, Gargarian M, Gionfriddo M, Batson AG: Atracurium: Clinical strategies for preventing histamine release and attenuating the hemodynamic response. *Br J Anaesth* 57:550-553a, 1985
21. Chipman P, Glover WE: Histamine<sub>2</sub> receptors in the human peripheral circulation. *Br J Pharmacol* 56:494-496, 1976
22. Chand N: Distribution and classification of airway histamine receptors: The physiological significance of histamine H<sub>2</sub>-receptors. *Adv Pharmacol Chemother* 17:103-131, 1980
23. Hirshman CA, Downes H: The basenji-greyhound dog model of asthma: Influence of atropine on antigen-induced bronchoconstriction. *J Appl Physiol* 50:761-765, 1981
24. Lichtenstein LM, Gillespie E: The effects of H<sub>1</sub> and H<sub>2</sub> antihistamines on allergic release and its inhibition by histamine. *J Pharmacol Exp Ther* 192:441-450, 1975
25. Vetterman J, Beck KC, Lindahl SHE, Brichant JF, Rehder K: Actions of enflurane, isoflurane, vecuronium, atracurium and pancuronium on pulmonary resistance in dogs. *ANESTHESIOLOGY* 69:688-695, 1988
26. Ludwig MS, Dreshaj I, Solway J, Munoz A, Ingram RH: Partitioning of pulmonary resistance during constriction in the dog: Effects of volume history. *J Appl Physiol* 62:807-815, 1987
27. Menkes H, Traystman RJ: State of the art: Collateral ventilation. *Am Rev Respir Dis* 116:287-309, 1977
28. Menkes H, Macklem PT: Collateral flow, *Handbook of Physiology: The Respiratory System III*. Bethesda, American Physiological Society, 1984, pp 337-353
29. Smith LJ, Inners CR, Terry PB, Menkes HA, Traystman RJ: Effect of methacholine and hypocapnia on airways and collateral ventilation in dogs. *J Appl Physiol* 46:966-972, 1979
30. Traystman RJ, Terry PB, Menkes HA: Carbon dioxide - a major determinant of collateral ventilation. *J Appl Physiol* 45:69-74, 1978
